# Supplementary material for: Electronic and morphological dual modulation of NiO by indium-doping for highly improved xylene sensing
Source: Royal Society of Chemistry journal article supplement (doi:10.1039/d1nj06082a), 2022-01-01
Supplement: d1nj06082a1.pdf [file d1nj06082a1.pdf]

# Supporting Information

## Electronic and morphological dual modulation of NiO by indium-doping for highly improved xylene sensing

Zhankai Zhang, Qihua Liang, Jiayu Li, Xiao Liang, Lan Yang, Qi Zhang, Xiaoxin

Zou, Hui Chen\* and Guo-Dong Li\*

State Key Laboratory of Inorganic Synthesis and Preparative Chemistry, College of  
Chemistry, Jilin University, Changchun 130012, P. R. China

\*Corresponding Author:

**E-mail address:** [chenhui@jlu.edu.cn](mailto:chenhui@jlu.edu.cn) (H. Chen); [lgd@jlu.edu.cn](mailto:lgd@jlu.edu.cn) (G.-D. Li)

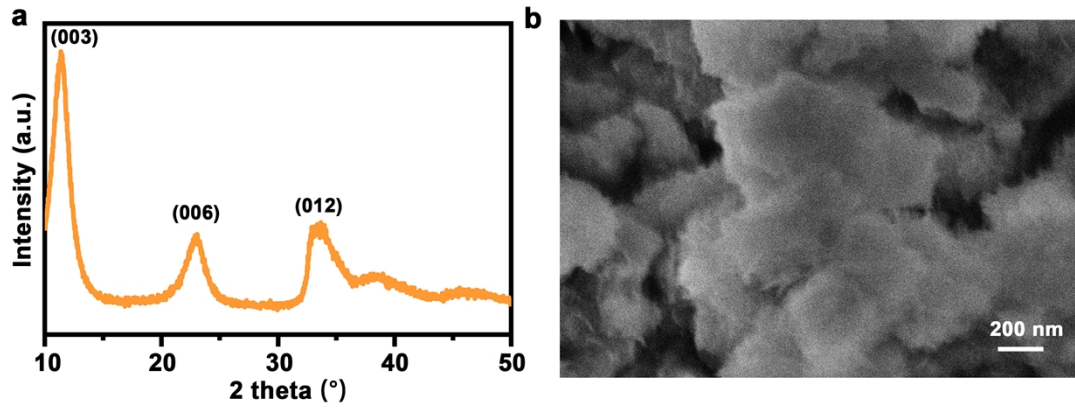

**Figure S1** (a) XRD pattern and (b) SEM image of NiIn-LDH precursor of INO-III.

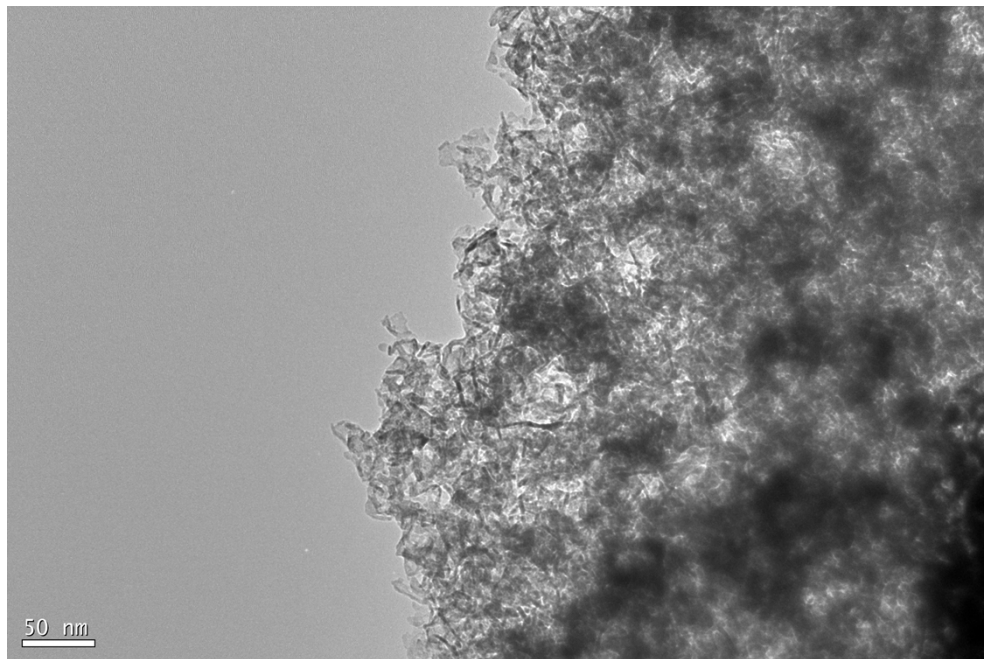

**Figure S2** TEM image of INO-III.

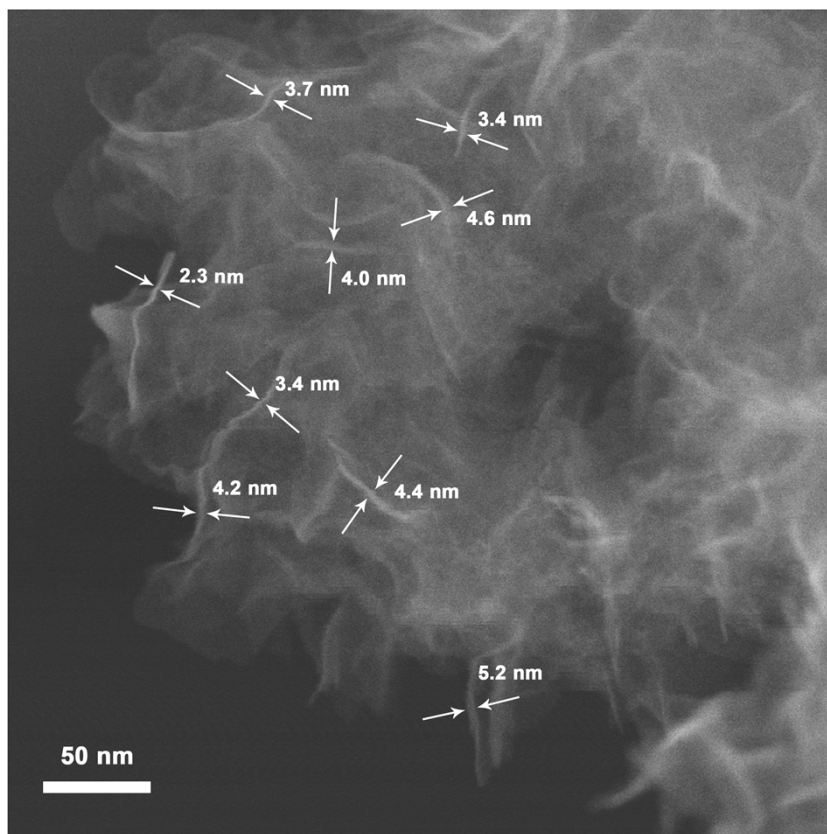

**Figure S3** Scanning TEM image of INO-III, which show that the material is composed of ultrathin nanosheets with a 2-5 nm thickness.

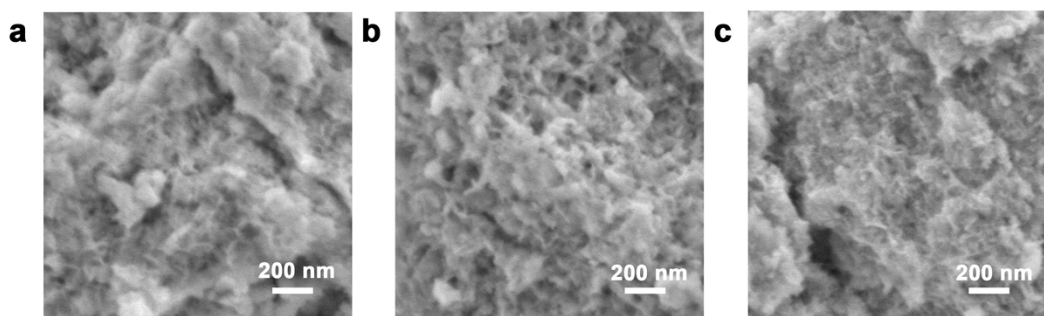

**Figure S4** SEM images of (a) INO-I, (b) INO-II and (c) INO-IV, respectively.

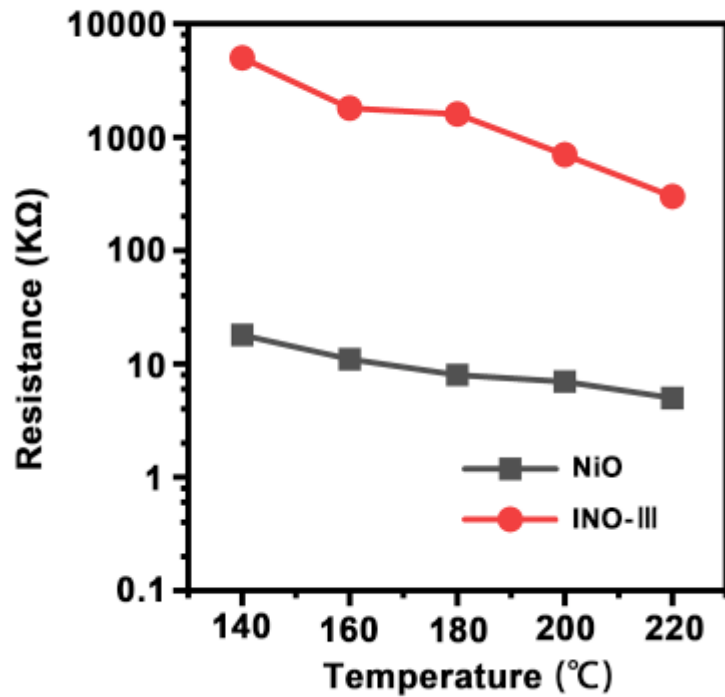

**Figure S5** Base resistances in air of the sensors based on NiO and INO-III at different operating temperatures.

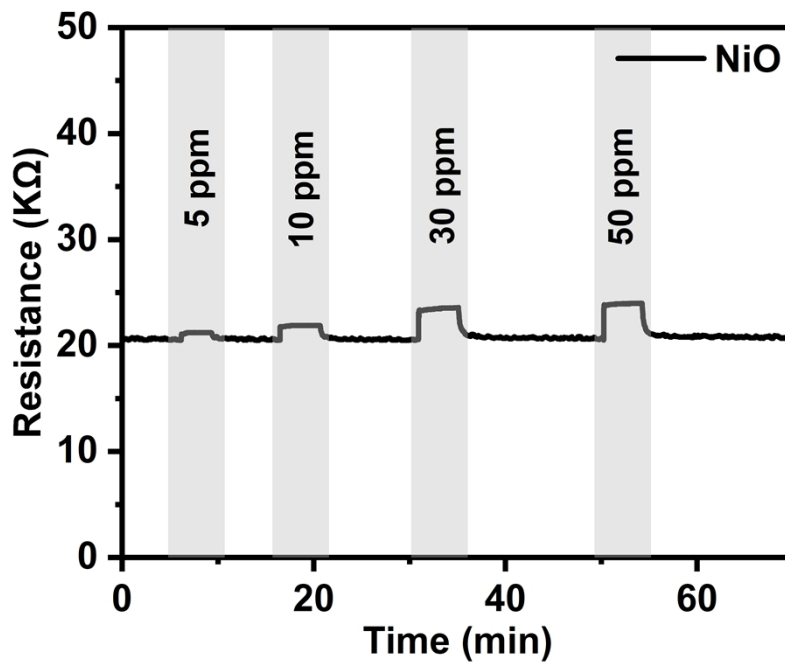

**Figure S6** Dynamic sensing transients of pristine NiO-based sensor toward xylene in the concentration range of 5-50 ppm at 160 °C.

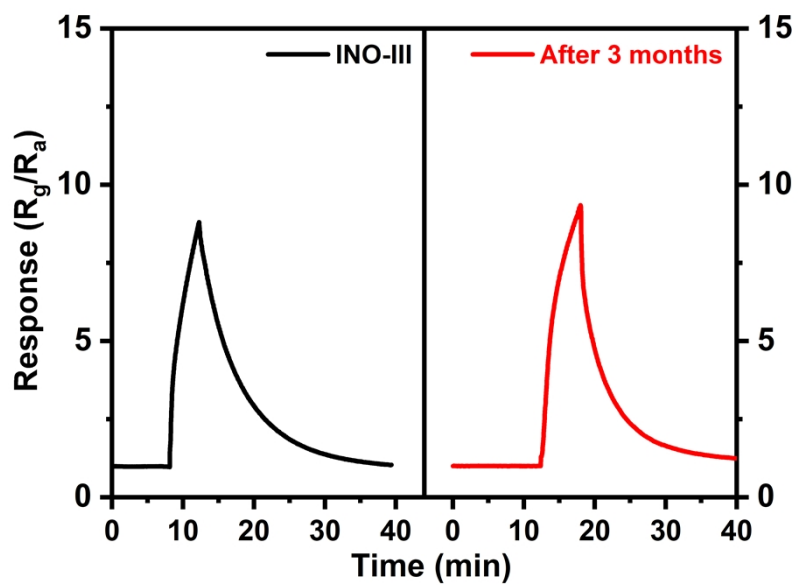

**Figure S7** Response-recovery curves of INO-III-based sensor to 10 ppm of xylene at 160 °C before and after three months.

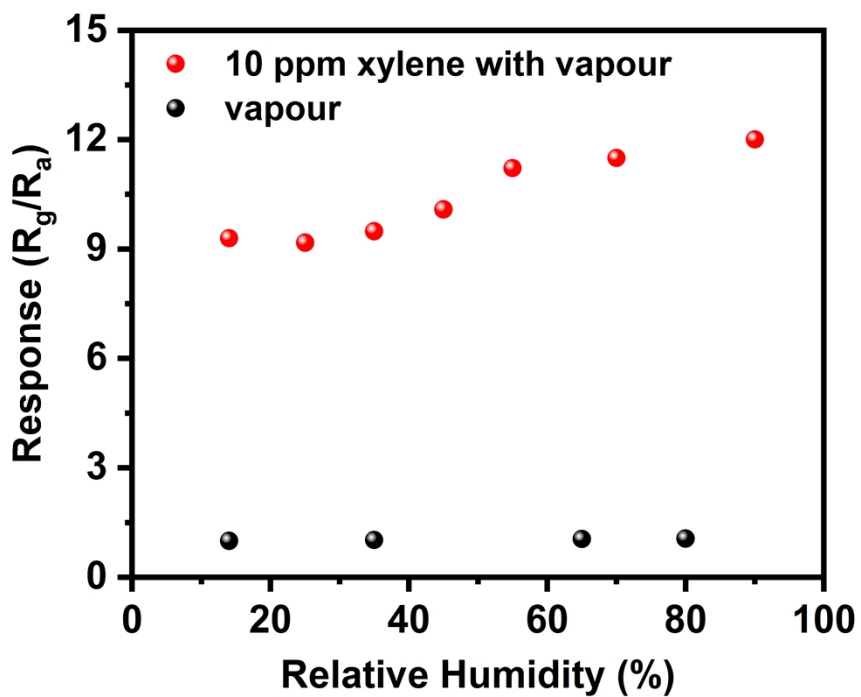

**Figure S8** The response vs humidity to 10 ppm of xylene at 160 °C of INO-III based sensor.
